# Supplementary material
Source: PubMed Central journal article supplement (PMC3960530)

**Figure S1**

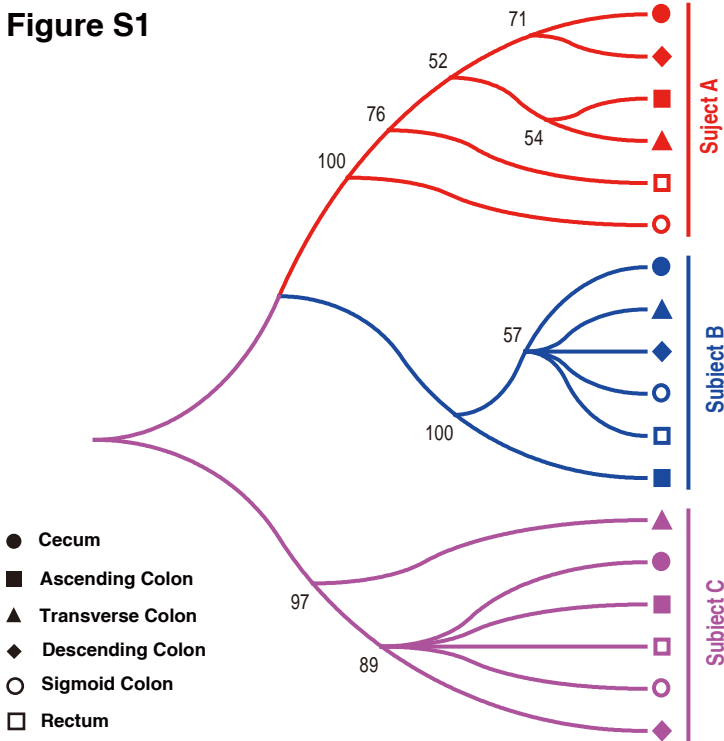

Supplement: ismej2013185x1.pdf [file ismej2013185x1.pdf]
